# Supplementary material for: Porcine Epidemic Diarrhea Virus Shedding and Antibody Response in Swine Farms: A Longitudinal Study
Source: PubMed Central journal article supplement (PMC5156881; doi:10.3389/fmicb.2016.02009), 2016-12-15
Supplement: Data_Sheet_1.pdf [file Data_Sheet_1.pdf]

## Supplementary Material

### Porcine Epidemic Diarrhea Virus Shedding and Antibody Response in Swine Farms: a Longitudinal Study

Cristina Bertasio<sup>1</sup>, Enrico Giacomini<sup>1</sup>, Massimiliano Lazzaro<sup>1</sup>, Simona Perulli<sup>1</sup>, Alice Papetti<sup>1</sup>, Antonio Lavazza<sup>1</sup>, Davide Lelli<sup>1</sup>, Giovanni Alborali<sup>1</sup>, Maria Beatrice Boniotti<sup>1\*</sup>

<sup>1</sup>Istituto Zooprofilattico Sperimentale della Lombardia ed Emilia Romagna, Brescia, Italy

\* **Correspondence:** Maria Beatrice Boniotti, Istituto Zooprofilattico Sperimentale della Lombardia ed Emilia Romagna, Brescia, Italy

[mariabeatrice.boniotti@izsler.it](mailto:mariabeatrice.boniotti@izsler.it)

#### Supplementary Figures

**Supplementary Figure 1.** Dynamic range of the standard curve for the quantitative PEDV *S1* gene-based qRT-PCR assay. The C<sub>q</sub> values of the 10-fold stock PEDV ssRNA transcript ( $2 \times 10^8 - 2 \times 10^0$  copies/ $\mu$ L) solutions are dependent on the log values of the transcript amounts.

#### Supplementary Tables

**Supplementary Table 1. Order of appearance of PED symptoms in the different units of the farm.**

| Farm | DPI | Unit               | Symptoms |          |          |             |          |           |
|------|-----|--------------------|----------|----------|----------|-------------|----------|-----------|
|      |     |                    | diarrhea | vomiting | anorexia | dehydration | cachexia | agalactia |
| 1    | 0   | fattening A        | x        | x        | x        |             |          |           |
|      | 1-2 | gestation          | x        |          |          |             |          |           |
|      | 1-2 | delivery (litters) | x        |          |          | x           | x        |           |
|      | 1-2 | delivery (sows)    | x        |          |          |             |          | x         |
|      | 3   | weaning            | x        |          |          |             |          |           |
|      | 3   | growing            | x        |          |          |             |          |           |
|      | 5   | fattening B        | x        |          |          |             |          |           |
| 2    | 0   | fattening          | x        |          | x        |             |          |           |
|      | 3   | gestation          | x        |          |          |             |          |           |
|      | 3   | delivery (litters) | x        |          | x        |             |          |           |
|      | 3   | delivery (sows)    | x        |          | x        |             |          | x         |
|      | 3   | weaning            | x        |          |          |             |          |           |
|      | 4-5 | growing            | x        |          |          |             |          |           |
| 3    | 0   | gestation          | x        |          | x        |             |          |           |
|      | 1   | delivery (litters) | x        |          | x        | x           |          |           |
|      | 1   | delivery (sows)    | x        |          |          |             |          | x         |
|      | 5   | weaning            | x        |          |          |             |          |           |
|      | 5   | growing            | x        |          |          |             |          |           |
|      | 5   | fattening          | x        |          |          |             |          |           |
| 4    | 0   | delivery (litters) | x        |          |          |             | x        |           |
|      | 0   | delivery (sows)    | x        |          |          |             |          |           |
|      | 3   | gestation          | x        |          |          |             |          |           |

DPI (Days Post Infection): days from the first appearance of the infection in the farm, x: presence of symptoms.

**Supplementary Table 2. Maximum fecal score and percentage of diarrheic animals per farm.**

| Farm | Sampling time | Date    | Gestation unit |                       | Delivery room |                       |             |                       | Weaning unit |                       | Growing unit |                       | Fattening unit A |                       | Fattening unit B |                       |
|------|---------------|---------|----------------|-----------------------|---------------|-----------------------|-------------|-----------------------|--------------|-----------------------|--------------|-----------------------|------------------|-----------------------|------------------|-----------------------|
|      |               |         | Fecal score    | Diarrheic animals (%) | Sows          |                       | Piglets     |                       | Fecal score  | Diarrheic animals (%) | Fecal score  | Diarrheic animals (%) | Fecal score      | Diarrheic animals (%) | Fecal score      | Diarrheic animals (%) |
|      |               |         |                |                       | Fecal score   | Diarrheic animals (%) | Fecal score | Diarrheic animals (%) |              |                       |              |                       |                  |                       |                  |                       |
| 1    | preliminary   | 13 Jan  | 4              | 21-50                 | 2             | 6-20                  | 4           | >50                   | 2            | 0-5                   | 4            | 21-50                 | 4                | >50                   | 0                | 0                     |
|      | 1             | 16 Jan  | 3              | 21-50                 | 2             | 5                     | 4           | >50*                  | 3            | 21-50                 | 4            | 21-50                 | 4                | >50                   | 0                | 0                     |
|      | 2             | 2 Feb   | 0              | 0                     | 0             | 0                     | 4           | 6-20*                 | 0            | 0                     | 0            | 0                     | 2                | 0-5                   | 2                | 6-20                  |
|      | 3             | 12 Feb  | 0              | 0                     | 0             | 0                     | 4           | 21-50                 | 0            | 0*                    | 0            | 0                     | 0                | 0                     | 2                | 21-50                 |
|      | 4             | 12 Mar  | 0              | 0                     | 0             | 0                     | 0           | 0                     | 2            | 0-5*                  | 2            | 0-5                   | 2                | 0-5                   | 2                | 0-5                   |
|      | 5             | 17 Apr  | 0              | 0                     | 0             | 0                     | 0           | 0                     | 0            | 0                     | 0            | 0*                    | 0                | 0                     | 0                | -                     |
|      | 6             | 4 June  | 0              | 0                     | 0             | 0                     | 0           | 0                     | 0            | 0                     | 0            | 0                     | 0                | 0*                    | 0                | -*                    |
| 2    | preliminary   | 31 Jan  | 4              | 6-20                  | 2             | 0-5                   | 4           | >50                   | 4            | 6-20                  | 4            | 6-20                  | 4                | 6-20                  | /                | /                     |
|      | 1             | 3 Feb   | 3              | 0-5                   | 0             | 0                     | 4           | 21-50*                | 3            | 0-5                   | 3            | 0-5                   | 4                | 6-20                  | /                | /                     |
|      | 2             | 18 Feb  | 0              | 0                     | 2             | 0-5                   | 2           | 0-5*                  | 0            | 0                     | 0            | 0                     | 0                | 0                     | /                | /                     |
|      | 3             | 4 Mar   | 0              | 0                     | 0             | 0                     | 0           | 0                     | 0            | 0*                    | 0            | 0                     | 0                | 0                     | /                | /                     |
|      | 4             | 8 Apr   | 0              | 0                     | 0             | 0                     | 0           | 0                     | 0            | 0*                    | 0            | 0                     | 0                | 0                     | /                | /                     |
|      | 5             | 14 May  | 0              | 0                     | 0             | 0                     | 0           | 0                     | 0            | 0                     | 0            | 0*                    | 0                | 0                     | /                | /                     |
| 3    | preliminary   | 18 Feb  | 4              | 0-5                   | 4             | 0-5                   | 4           | 6-20                  | 0            | 0                     | 0            | 0                     | 0                | 0                     | /                | /                     |
|      | 1             | 20 Feb  | 4              | 6-20                  | 4             | 21-50                 | 4           | >50*                  | 2            | 0-5                   | 4            | 0-5                   | 4                | 0-5                   | /                | /                     |
|      | 2             | 5 Mar   | 0              | 0                     | 0             | 0                     | 0           | 0*                    | 0            | 0                     | 0            | 0                     | 0                | 0                     | /                | /                     |
|      | 3             | 24 Mar  | 0              | 0                     | 0             | 0                     | 0           | 0                     | 0            | 0                     | 0            | 0                     | 0                | 0                     | /                | /                     |
|      | 4             | 29 Apr  | 0              | 0                     | 0             | 0                     | 0           | 0                     | 0            | 0                     | 0            | 0                     | 0                | 0                     | /                | /                     |
| 4    | preliminary   | 18 May  | 2              | 0-5                   | 2             | 0-5                   | 3           | 6-20                  | 0            | 0                     | /            | /                     | /                | /                     | /                | /                     |
|      | 1             | 6 June  | 0              | 0                     | 4             | 21-50                 | 4           | 21-50*                | 0            | 0                     | /            | /                     | /                | /                     | /                | /                     |
|      | 2             | 17 June | 0              | 0                     | 2             | 0-5                   | 0           | 0*                    | 0            | 0                     | /            | /                     | /                | /                     | /                | /                     |
|      | 3             | 23 July | 0              | 0                     | 0             | 0                     | 0           | 0                     | 0            | 0*                    | /            | /                     | /                | /                     | /                | /                     |
|      | 4             | 5 Aug   | 0              | 0                     | 0             | 0                     | 0           | 0                     | 0            | 0*                    | /            | /                     | /                | /                     | /                | /                     |

\*indicates the location of animals involved in the study; “/” indicates that samples were not available

**Supplementary Table 3. Symptoms observation, viral titers in fecal homogenates and cELISA results for animals involved in the longitudinal study.**

| Farm | Animal ID | 1° SAMPLING |                |        | 2° SAMPLING |                |        | 3° SAMPLING |                |        | 4° SAMPLING |                |        | 5° SAMPLING |                |        | 6° SAMPLING |                |        |
|------|-----------|-------------|----------------|--------|-------------|----------------|--------|-------------|----------------|--------|-------------|----------------|--------|-------------|----------------|--------|-------------|----------------|--------|
|      |           | Diarrhea    | PEDv copies/mL | cELISA | Diarrhea    | PEDv copies/mL | cELISA | Diarrhea    | PEDv copies/mL | cELISA | Diarrhea    | PEDv copies/mL | cELISA | Diarrhea    | PEDv copies/mL | cELISA | Diarrhea    | PEDv copies/mL | cELISA |
| 1    | 1         | +           | <LOQ           | +      | NA          | NA             | +      | +           | -              | +      | -           | -              | +      | -           | -              | +      | -           | -              | +      |
| 1    | 2         | -           | -              | -      | NA          | NA             | +      | -           | -              | +      | -           | -              | +      | -           | -              | +      | -           | -              | +      |
| 1    | 3         | +           | -              | -      | NA          | NA             | +      | -           | -              | +      | -           | -              | +      | -           | -              | +      | -           | -              | +      |
| 1    | 4         | -           | 2.00E+05       | -      | NA          | NA             | +      | -           | -              | +      | -           | -              | +      | -           | -              | +      | -           | -              | +      |
| 1    | 5         | -           | -              | -      | NA          | NA             | +      | -           | -              | +      | +           | <LOD           | +      | -           | -              | +      | -           | -              | +      |
| 1    | 6         | +           | 1.00E+05       | -      | NA          | NA             | +      | -           | -              | +      | -           | -              | +      | -           | -              | +      | -           | -              | +      |
| 1    | 7         | +           | -              | +      | NA          | NA             | +      | -           | -              | +      | -           | -              | +      | S           | S              | S      | S           | S              | S      |
| 1    | 8         | +           | 5.90E+05       | -      | NA          | NA             | +      | -           | -              | +      | -           | -              | +      | -           | -              | +      | S           | S              | S      |
| 1    | 9         | +           | 1.20E+06       | -      | NA          | NA             | +      | -           | -              | +      | -           | -              | NA     | -           | -              | +      | S           | S              | S      |
| 1    | 10        | +           | 9.50E+06       | +      | NA          | NA             | +      | -           | -              | +      | -           | -              | +      | -           | -              | +      | S           | S              | S      |
| 1    | 11        | +           | 2.20E+05       | -      | NA          | NA             | +      | D           | D              | D      | D           | D              | D      | D           | D              | D      | D           | D              | D      |
| 1    | 12        | +           | 4.60E+04       | +      | NA          | NA             | +      | -           | -              | +      | -           | -              | +      | -           | -              | +      | -           | -              | +      |
| 1    | 13        | +           | 2.40E+07       | +      | NA          | NA             | +      | -           | -              | +      | NA          | NA             | NA     | -           | -              | +      | -           | -              | +      |
| 1    | 14        | +           | 9.50E+04       | -      | NA          | NA             | +      | -           | -              | +      | -           | 4.90E+04       | +      | S           | S              | S      | S           | S              | S      |
| 1    | 15        | -           | -              | -      | NA          | NA             | +      | -           | -              | +      | +           | 9.40E+05       | +      | S           | S              | S      | S           | S              | S      |
| 1    | 16        | +           | -              | -      | NA          | NA             | -      | -           | -              | +      | +           | 7.90E+04       | +      | S           | S              | S      | S           | S              | S      |
| 1    | 17        | -           | 3.70E+07       | -      | NA          | NA             | +      | -           | -              | +      | -           | -              | +      | -           | <LOQ           | +      | S           | S              | S      |
| 1    | 18        | +           | 2.10E+06       | -      | NA          | NA             | -      | -           | -              | +      | -           | -              | +      | S           | S              | S      | S           | S              | S      |
| 1    | 19        | -           | -              | -      | NA          | NA             | D      | D           | D              | D      | D           | D              | D      | D           | D              | D      | D           | D              | D      |
| 2    | 1         | +           | -              | -      | +           | <LOQ           | +      | -           | -              | +      | -           | -              | -      | -           | -              | NA     | /           | /              | /      |
| 2    | 2         | +           | 3.30E+05       | -      | -           | -              | +      | -           | -              | +      | -           | -              | +      | -           | -              | +      | /           | /              | /      |
| 2    | 3         | +           | 1.10E+06       | -      | -           | -              | +      | -           | -              | +      | -           | -              | +      | -           | -              | +      | /           | /              | /      |
| 2    | 4         | +           | 1.10E+07       | -      | -           | -              | +      | -           | -              | +      | -           | -              | +      | -           | -              | +      | /           | /              | /      |
| 2    | 5         | +           | 3.20E+04       | -      | -           | -              | +      | -           | -              | +      | -           | -              | +      | -           | -              | +      | /           | /              | /      |
| 2    | 6         | +           | 3.30E+08       | -      | +           | -              | +      | -           | -              | +      | -           | 3.00E+04       | +      | -           | -              | +      | /           | /              | /      |
| 2    | 7         | +           | 1.20E+05       | -      | +           | <LOQ           | -      | -           | -              | +      | -           | -              | +      | S           | S              | S      | /           | /              | /      |
| 2    | 8         | +           | -              | -      | +           | 8.30E+05       | -      | -           | -              | +      | D           | D              | D      | D           | D              | D      | /           | /              | /      |
| 2    | 9         | +           | 7.00E+04       | -      | -           | -              | +      | -           | -              | +      | -           | -              | +      | -           | -              | -      | /           | /              | /      |
| 2    | 10        | +           | 2.60E+04       | -      | -           | -              | +      | -           | -              | +      | D           | D              | D      | D           | D              | D      | /           | /              | /      |
| 2    | 11        | +           | 7.00E+04       | -      | -           | -              | +      | -           | -              | +      | -           | -              | +      | -           | -              | +      | /           | /              | /      |
| 2    | 12        | +           | 2.60E+04       | -      | -           | -              | +      | -           | -              | +      | -           | -              | +      | -           | -              | +      | /           | /              | /      |
| 2    | 13        | +           | 7.00E+04       | -      | -           | -              | +      | -           | -              | +      | D           | D              | D      | D           | D              | D      | /           | /              | /      |
| 2    | 14        | +           | 2.60E+04       | -      | +           | -              | +      | -           | -              | +      | -           | -              | +      | -           | -              | +      | /           | /              | /      |
| 2    | 15        | +           | -              | -      | -           | -              | +      | -           | -              | +      | -           | -              | +      | -           | -              | +      | /           | /              | /      |
| 2    | 16        | +           | 7.30E+04       | -      | -           | -              | +      | -           | -              | +      | D           | D              | D      | D           | D              | -      | /           | /              | /      |

|   |    |   |          |   |   |          |   |   |          |   |   |   |   |   |   |    |   |   |   |
|---|----|---|----------|---|---|----------|---|---|----------|---|---|---|---|---|---|----|---|---|---|
| 2 | 17 | + | 1.00E+04 | - | - | -        | + | - | -        | + | - | - | + | - | - | +  | / | / | / |
| 2 | 18 | + | 1.40E+05 | - | + | -        | + | + | -        | + | - | - | + | - | - | +  | / | / | / |
| 2 | 19 | + | 1.00E+08 | - | - | -        | + | - | -        | + | - | - | + | - | - | +  | / | / | / |
| 2 | 20 | + | 4.50E+04 | - | - | -        | + | - | -        | + | - | - | + | - | - | +  | / | / | / |
| 2 | 21 | + | 3.60E+05 | - | - | -        | + | - | -        | + | - | - | + | S | S | S  | / | / | / |
| 2 | 22 | + | < LOQ    | - | - | -        | + | - | -        | + | - | - | + | - | - | -  | / | / | / |
| 2 | 23 | + | 1.30E+08 | - | - | -        | + | - | -        | + | - | - | + | - | - | +  | / | / | / |
| 2 | 24 | + | 6.40E+06 | - | + | < LOQ    | + | + | 1.10E+04 | + | - | - | - | - | - | NA | / | / | / |
| 3 | 1  | + | 7.80E+04 | - | - | -        | + | - | -        | + | - | - | - | / | / | /  | / | / | / |
| 3 | 2  | + | 1.50E+06 | - | - | -        | + | D | D        | D | D | D | D | / | / | /  | / | / | / |
| 3 | 3  | + | 3.50E+05 | - | - | -        | + | - | -        | + | - | - | + | / | / | /  | / | / | / |
| 3 | 4  | + | 5.60E+06 | - | - | -        | + | - | -        | + | S | S | S | / | / | /  | / | / | / |
| 3 | 5  | + | 6.80E+05 | - | - | -        | + | - | -        | + | S | S | S | / | / | /  | / | / | / |
| 3 | 6  | + | 1.20E+04 | - | - | -        | + | - | -        | + | - | - | + | / | / | /  | / | / | / |
| 3 | 7  | + | 9.10E+04 | - | - | -        | + | - | -        | + | S | S | S | / | / | /  | / | / | / |
| 3 | 8  | + | 1.40E+04 | - | - | -        | + | - | -        | + | - | - | + | / | / | /  | / | / | / |
| 3 | 9  | + | < LOQ    | - | - | -        | + | - | -        | + | S | S | S | / | / | /  | / | / | / |
| 3 | 10 | + | 5.10E+04 | - | - | -        | + | - | -        | + | S | S | S | / | / | /  | / | / | / |
| 3 | 11 | + | 4.20E+05 | - | - | -        | + | - | -        | + | S | S | S | / | / | /  | / | / | / |
| 3 | 12 | + | 5.40E+04 | - | - | -        | + | - | -        | - | S | S | S | / | / | /  | / | / | / |
| 3 | 13 | + | < LOQ    | - | - | -        | + | - | -        | + | S | S | S | / | / | /  | / | / | / |
| 3 | 14 | + | 5.50E+06 | - | - | -        | + | - | -        | + | - | - | + | / | / | /  | / | / | / |
| 3 | 15 | + | 2.70E+06 | - | - | -        | + | - | -        | + | S | S | S | / | / | /  | / | / | / |
| 3 | 16 | + | 2.40E+06 | - | - | -        | - | - | -        | + | S | S | S | / | / | /  | / | / | / |
| 3 | 17 | + | 1.20E+05 | - | + | 3.00E+05 | + | - | -        | + | - | - | + | / | / | /  | / | / | / |
| 3 | 18 | + | 1.50E+05 | - | - | -        | - | - | -        | + | S | S | S | / | / | /  | / | / | / |
| 3 | 19 | + | 6.90E+05 | - | - | -        | - | - | -        | + | - | - | + | / | / | /  | / | / | / |
| 3 | 20 | + | 2.50E+04 | - | - | -        | + | - | -        | + | S | S | S | / | / | /  | / | / | / |
| 3 | 21 | + | 4.10E+05 | - | - | -        | + | - | -        | + | - | - | + | / | / | /  | / | / | / |
| 3 | 22 | + | 6.40E+04 | - | - | -        | + | - | -        | + | - | - | + | / | / | /  | / | / | / |
| 3 | 23 | + | 1.70E+05 | - | - | -        | - | - | -        | + | - | - | + | / | / | /  | / | / | / |
| 3 | 24 | + | 1.10E+04 | - | - | -        | + | - | -        | + | S | S | S | / | / | /  | / | / | / |
| 3 | 25 | + | 1.40E+06 | - | + | 1.10E+04 | + | - | -        | + | - | - | + | / | / | /  | / | / | / |
| 3 | 26 | + | 9.00E+06 | - | + | 6.70E+03 | + | - | -        | + | S | S | S | / | / | /  | / | / | / |
| 3 | 27 | + | 8.00E+05 | - | - | -        | + | - | -        | + | - | - | + | / | / | /  | / | / | / |
| 3 | 28 | + | 1.50E+08 | - | - | -        | + | - | -        | + | - | - | + | / | / | /  | / | / | / |
| 3 | 29 | + | 9.60E+05 | - | - | -        | + | - | -        | + | - | - | + | / | / | /  | / | / | / |
| 3 | 30 | + | 4.00E+05 | - | - | -        | + | - | -        | + | - | - | + | / | / | /  | / | / | / |
| 4 | 1  | + | 1.70E+07 | - | - | -        | + | - | -        | + | - | - | + | / | / | /  | / | / | / |
| 4 | 2  | + | 5.90E+06 | - | D | D        | D | D | D        | D | D | D | D | / | / | /  | / | / | / |
| 4 | 3  | + | 8.60E+06 | - | D | D        | D | D | D        | D | D | D | D | / | / | /  | / | / | / |
| 4 | 4  | + | 1.10E+05 | - | D | D        | D | D | D        | D | D | D | D | / | / | /  | / | / | / |

## Supplementary Material

|   |    |   |          |   |    |          |    |    |    |    |   |   |   |   |   |   |   |   |   |
|---|----|---|----------|---|----|----------|----|----|----|----|---|---|---|---|---|---|---|---|---|
| 4 | 5  | + | 6.20E+07 | - | +  | -        | +  | -  | -  | +  | - | - | + | / | / | / | / | / | / |
| 4 | 6  | + | 1.50E+04 | - | +  | 1.80E+04 | +  | -  | -  | -  | - | - | + | / | / | / | / | / | / |
| 4 | 7  | + | 3.60E+07 | - | -  | -        | +  | -  | -  | +  | - | - | + | / | / | / | / | / | / |
| 4 | 8  | + | 2.40E+05 | - | -  | -        | +  | -  | -  | +  | - | - | + | / | / | / | / | / | / |
| 4 | 9  | + | < LOQ    | - | -  | -        | +  | -  | -  | +  | - | - | + | / | / | / | / | / | / |
| 4 | 10 | + | 1.80E+05 | - | D  | D        | D  | D  | D  | D  | D | D | D | / | / | / | / | / | / |
| 4 | 11 | + | 9.80E+06 | - | -  | -        | +  | -  | -  | +  | D | D | D | / | / | / | / | / | / |
| 4 | 12 | + | 6.40E+05 | - | D  | D        | D  | D  | D  | D  | D | D | D | / | / | / | / | / | / |
| 4 | 13 | + | 1.40E+08 | - | NA | NA       | NA | NA | NA | NA | - | - | + | / | / | / | / | / | / |
| 4 | 14 | + | < LOQ    | - | NA | NA       | NA | NA | NA | NA | - | - | + | / | / | / | / | / | / |
| 4 | 15 | + | 4.70E+07 | - | NA | NA       | NA | NA | NA | NA | - | - | + | / | / | / | / | / | / |
| 4 | 16 | + | 1.20E+05 | - | -  | -        | +  | -  | -  | +  | - | - | + | / | / | / | / | / | / |
| 4 | 17 | + | 5.60E+04 | - | -  | -        | +  | -  | -  | +  | - | - | + | / | / | / | / | / | / |
| 4 | 18 | + | 5.00E+07 | - | -  | -        | +  | -  | -  | +  | - | - | + | / | / | / | / | / | / |
| 4 | 19 | + | < LOQ    | + | -  | -        | +  | -  | -  | +  | - | - | - | / | / | / | / | / | / |
| 4 | 20 | + | -        | - | -  | -        | -  | -  | -  | -  | - | - | - | / | / | / | / | / | / |
| 4 | 21 | - | -        | + | -  | -        | +  | -  | -  | -  | - | - | - | / | / | / | / | / | / |
| 4 | 22 | - | -        | + | -  | -        | +  | -  | -  | +  | - | - | + | / | / | / | / | / | / |
| 4 | 23 | + | 4.20E+04 | + | -  | -        | +  | -  | -  | +  | D | D | D | / | / | / | / | / | / |
| 4 | 24 | - | -        | + | -  | -        | +  | -  | -  | +  | D | D | D | / | / | / | / | / | / |
| 4 | 25 | + | < LOQ    | - | +  | 1.80E+06 | +  | -  | -  | +  | D | D | D | / | / | / | / | / | / |
| 4 | 26 | + | < LOQ    | - | +  | -        | +  | -  | -  | +  | - | - | + | / | / | / | / | / | / |
| 4 | 27 | + | 3.80E+05 | - | +  | < LOQ    | +  | -  | -  | +  | - | - | - | / | / | / | / | / | / |
| 4 | 28 | + | 2.10E+08 | - | +  | < LOQ    | +  | -  | -  | +  | - | - | + | / | / | / | / | / | / |
| 4 | 29 | + | 2.60E+08 | - | +  | < LOD    | +  | -  | -  | +  | - | - | + | / | / | / | / | / | / |
| 4 | 30 | + | 3.60E+04 | + | +  | 1.90E+04 | +  | -  | -  | +  | - | - | + | / | / | / | / | / | / |

+: presence/positive; -: absence/negative; NA: not available; D: died; S: sold.

**Supplementary Table 4. Determination of the LOD and the LOQ.**

| Replicate      | Theoretical ssRNA transcript copies/ $\mu$ L |                 |                 |                 |                 |                 |                 |                 |                 |                 |                 |                 |                    |                 |                    |                 |
|----------------|----------------------------------------------|-----------------|-----------------|-----------------|-----------------|-----------------|-----------------|-----------------|-----------------|-----------------|-----------------|-----------------|--------------------|-----------------|--------------------|-----------------|
|                | $2 \times 10^5$                              |                 | $2 \times 10^4$ |                 | $2 \times 10^3$ |                 | $2 \times 10^2$ |                 | $2 \times 10^1$ |                 | $2 \times 10^0$ |                 | $2 \times 10^{-1}$ |                 | $2 \times 10^{-2}$ |                 |
|                | Cq                                           | copies/ $\mu$ L | Cq              | copies/ $\mu$ L | Cq              | copies/ $\mu$ L | Cq              | copies/ $\mu$ L | Cq              | copies/ $\mu$ L | Cq              | copies/ $\mu$ L | Cq                 | copies/ $\mu$ L | Cq                 | copies/ $\mu$ L |
| 1              | 19.05                                        | 2.46E+05        | 23.09           | 1.56E+04        | 25.92           | 2.27E+03        | 29.78           | 1.63E+02        | 33.02           | 1.79E+01        | 37.05           | 1.14E+00        | 38.12              | 5.50E-01        | ND                 | 0.00E+00        |
| 2              | 19.04                                        | 2.48E+05        | 23.1            | 1.55E+04        | 26.09           | 2.02E+03        | 29.44           | 2.05E+02        | 33.32           | 1.46E+01        | 35.88           | 2.54E+00        | 39.76              | 1.80E-01        | 37.45              | 5.75E-01        |
| 3              | 19.51                                        | 1.80E+05        | 23.28           | 1.37E+04        | 25.76           | 2.53E+03        | 29.34           | 2.20E+02        | 33.76           | 1.08E+01        | 35.45           | 3.40E+00        | 37.78              | 6.94E-01        | ND                 | 0.00E+00        |
| 4              | 19.06                                        | 2.45E+05        | 23.18           | 1.47E+04        | 25.79           | 2.48E+03        | 29.51           | 1.96E+02        | 33.02           | 1.79E+01        | 35.65           | 2.97E+00        | ND                 | 0.00E+00        | ND                 | 0.00E+00        |
| 5              | 18.68                                        | 3.17E+05        | 23.27           | 1.38E+04        | 25.89           | 2.32E+03        | 29.54           | 1.92E+02        | 33.49           | 1.30E+01        | 35.98           | 2.37E+00        | ND                 | 0.00E+00        | ND                 | 0.00E+00        |
| 6              | 18.91                                        | 2.71E+05        | 23.28           | 1.37E+04        | 25.9            | 2.30E+03        | 29.22           | 2.39E+02        | 33.26           | 1.52E+01        | 37.05           | 1.14E+00        | 37.52              | 8.29E-01        | ND                 | 0.00E+00        |
| 7              | 19.02                                        | 2.51E+05        | 24.01           | 8.35E+03        | 25.65           | 2.73E+03        | 29.51           | 1.96E+02        | 32.59           | 2.40E+01        | 35.99           | 2.35E+00        | 37.54              | 8.18E-01        | ND                 | 0.00E+00        |
| 8              | 19.13                                        | 2.33E+05        | 23.22           | 1.43E+04        | 25.98           | 2.18E+03        | 29.09           | 2.61E+02        | 33.62           | 1.19E+01        | 35.51           | 3.27E+00        | ND                 | 0.00E+00        | ND                 | 0.00E+00        |
| 9              | 18.76                                        | 3.00E+05        | 23.23           | 1.42E+04        | 25.63           | 2.76E+03        | 29.37           | 2.15E+02        | 33.11           | 1.68E+01        | 35.25           | 3.90E+00        | ND                 | 0.00E+00        | ND                 | 0.00E+00        |
| 10             | 19.01                                        | 2.53E+05        | 23.26           | 1.39E+04        | 25.85           | 2.38E+03        | 29.2            | 2.42E+02        | 33.01           | 1.80E+01        | 35.93           | 2.45E+00        | ND                 | 0.00E+00        | 38.33              | 3.06E-01        |
| <b>mean</b>    | 19.02                                        | 2.54E+05        | 23.29           | 1.38E+04        | 25.85           | 2.40E+03        | 29.4            | 2.13E+02        | 33.22           | 1.60E+01        | 35.97           | 2.55E+00        | 38.14              | 3.07E-01        | 37.89              | 8.81E-02        |
| <b>RSD%</b>    | 1.18%                                        | 14.64%          | 1.12%           | 14.77%          | 0.55%           | 9.76%           | 0.68%           | 13.51%          | 1.04%           | 23.89%          | 1.72%           | 35.23%          | 2.45%              | 120.37%         | 1.64%              | 222.72%         |
| <b>No pos.</b> | 10/10                                        |                 | 10/10           |                 | 10/10           |                 | 10/10           |                 | 10/10           |                 | 10/10           |                 | 5/10               |                 | 2/10               |                 |

ND= undetermined

**Supplementary Table 5. Determination of intra-assay variation.**

|                    | Copies/ $\mu$ L |          |          |
|--------------------|-----------------|----------|----------|
|                    | Sample1         | Sample2  | Sample3  |
| <b>Replicate 1</b> | 2.46E+05        | 7.67E+01 | 8.36E+03 |
| <b>Replicate 2</b> | 1.94E+05        | 7.68E+01 | 6.80E+03 |
| <b>Replicate 3</b> | 2.05E+05        | 9.06E+01 | 7.35E+03 |
| <b>mean</b>        | 2.15E+05        | 8.14E+01 | 7.50E+03 |
| <b>RSD%</b>        | 12.75%          | 9.83%    | 10.54%   |

**Supplementary Table 6. Determination of inter-assay variation.**

|              | Copies/ $\mu$ L |          |          |
|--------------|-----------------|----------|----------|
|              | Sample 1        | Sample 2 | Sample 3 |
| <b>Run1</b>  | 5.71E+04        | 7.15E+05 | 2.26E+03 |
| <b>Run 2</b> | 7.78E+04        | 8.08E+05 | 2.86E+03 |
| <b>Run 3</b> | 6.51E+04        | 7.53E+05 | 2.80E+03 |
| <b>Run 4</b> | 7.14E+04        | 8.55E+05 | 1.96E+03 |
| <b>mean</b>  | 6.79E+04        | 7.83E+05 | 2.47E+03 |
| <b>RSD%</b>  | 13.04%          | 7.85%    | 17.57%   |
