# Supplementary material for: Porcine Epidemic Diarrhea Virus Shedding and Antibody Response in Swine Farms: A Longitudinal Study
Source: PubMed Central journal article supplement (PMC5156881; doi:10.3389/fmicb.2016.02009), 2016-12-15
Supplement: Data_Sheet_2.pdf [file Data_Sheet_2.pdf]

Supplementary Table 7. MIQE checklist (Bustin *et al*, 2009)

| Item to check                                                         | Importance | checklist           | Item to check                                                            | Importance | checklist           |
|-----------------------------------------------------------------------|------------|---------------------|--------------------------------------------------------------------------|------------|---------------------|
| <b>Experimental design</b>                                            |            |                     | <b>qPCR oligonucleotides</b>                                             |            |                     |
| Definition of experimental groups                                     | E          | Materials & Methods | Primer sequences                                                         | E          | Materials & Methods |
| Number within each group                                              | E          | Materials & Methods | RTPrimerDB identification number                                         | D          | NA                  |
| Assay carried out by the core or investigator's laboratory?           | D          | ND                  | Probe sequences                                                          | D          | Materials & Methods |
| Acknowledgment of authors' contributions                              | D          | ND                  | Location and identity of any modifications                               | E          | Materials & Methods |
| <b>Sample</b>                                                         |            |                     | Manufacturer of oligonucleotides                                         | D          | ND                  |
| Description                                                           | E          | Materials & Methods | Purification method                                                      | D          | ND                  |
| Volume/mass of sample processed                                       | D          | Materials & Methods | <b>qPCR protocol</b>                                                     |            |                     |
| Microdissection or macrodissection                                    | E          | NA                  | Complete reaction conditions                                             | E          | Materials & Methods |
| Processing procedure                                                  | E          | Materials & Methods | Reaction volume and amount of cDNA                                       | E          | Materials & Methods |
| If frozen, how and how quickly?                                       | E          | Materials & Methods | Primer, (probe), Mg <sup>2+</sup> , and dNTP concentrations              | E          | Materials & Methods |
| If fixed, with what and how quickly?                                  | E          | NA                  | Polymerase identity and concentration                                    | E          | Materials & Methods |
| Sample storage conditions and duration (especially for FFPEb samples) | E          | Materials & Methods | Buffer/kit identity and manufacturer                                     | E          | Materials & Methods |
| <b>Nucleic acid extraction</b>                                        |            |                     | Exact chemical composition of the buffer                                 | D          | Proprietary         |
| Procedure and/or instrumentation                                      | E          | Materials & Methods | Additives (SYBR Green I, DMSO, and so forth)                             | E          | NA                  |
| Name of kit and details of any modifications                          | E          | Materials & Methods | Manufacturer of plates/tubes and catalog number                          | D          | ND                  |
| Source of additional reagents used                                    | D          | NA                  | Complete thermocycling parameters                                        | E          | Materials & Methods |
| Details of DNase or RNase treatment                                   | E          | NA                  | Reaction setup (manual/robotic)                                          | D          | Materials & Methods |
| Contamination assessment (DNA or RNA)                                 | E          | ND                  | Manufacturer of qPCR instrument                                          | E          | Materials & Methods |
| Nucleic acid quantification                                           | E          | Materials & Methods | <b>qPCR validation</b>                                                   |            |                     |
| Instrument and method                                                 | E          | Materials & Methods | Evidence of optimization (from gradients)                                | D          | Materials & Methods |
| Purity (A <sub>260</sub> /A <sub>280</sub> )                          | D          | ND                  | Specificity (gel, sequence, melt, or digest)                             | E          | Materials & Methods |
| Yield                                                                 | D          | ND                  | For SYBR Green I, C <sub>q</sub> of the NTC                              | E          | NA                  |
| RNA integrity: method instrument                                      | E          | ND                  | Calibration curves with slope and y intercept                            | E          | Table 3             |
| RIN/RQI or C <sub>q</sub> of 3' and 5' transcripts                    | E          | ND                  | PCR efficiency calculated from slope                                     | E          | Table 3             |
| Electrophoresis traces                                                | D          | NA                  | Confidence Intervals for PCR efficiency or Standard Error                | D          | ND                  |
| Inhibition testing (C <sub>q</sub> dilutions, spike, or other)        | E          | Materials & Methods | R <sup>2</sup> of calibration curve                                      | E          | Table 3             |
| <b>Reverse transcription</b>                                          |            |                     | Linear dynamic range                                                     | E          | Table 3             |
| Complete reaction conditions                                          | E          | Materials & Methods | C <sub>q</sub> variation at LOD                                          | E          | Table 3             |
| Amount of RNA and reaction volume                                     | E          | Materials & Methods | Confidence Intervals throughout range                                    | D          | ND                  |
| Priming oligonucleotide (if using GSP) and concentration              | E          | NA                  | Evidence for LOD                                                         | E          | Table S4            |
| Reverse transcriptase and concentration                               | E          | NA                  | If multiplex, efficiency and LOD of each assay                           | E          | NA                  |
| Temperature and time                                                  | E          | Materials & Methods | <b>Data analysis</b>                                                     |            |                     |
| Manufacturer of reagents and catalogue numbers                        | D          | Materials & Methods | qPCR analysis program (source, version)                                  | E          | Materials & Methods |
| C <sub>q</sub> s with and without reverse transcription               | D          | NA                  | Method of C <sub>q</sub> determination                                   | E          | Materials & Methods |
| Storage conditions of cDNA                                            | D          | NA                  | Outlier identification and disposition                                   | E          | ND                  |
| <b>qPCR target information</b>                                        |            |                     | Results for NTCs                                                         | E          | Materials & Methods |
| Gene symbol                                                           | E          | Materials & Methods | Justification of number and choice of reference genes                    | E          | NA                  |
| Sequence accession number                                             | E          | Materials & Methods | Description of normalization method                                      | E          | NA                  |
| Location of amplicon                                                  | D          | Materials & Methods | Number and concordance of biological replicates                          | D          | ND                  |
| Amplicon length                                                       | E          | Materials & Methods | Number and stage (reverse transcription or qPCR) of technical replicates | E          |                     |
| In silico specificity screen (BLAST, and so on)                       | E          | Materials & Methods | Repeatability (intra-assay variation)                                    | E          | Table 3, Table S5   |
| Pseudogenes, retropseudogenes, or other homologs?                     | D          | NA                  | Reproducibility (inter-assay variation, CV)                              | D          | Table 3, Table S6   |
| Sequence alignment                                                    | D          | ND                  | Power analysis                                                           | D          | ND                  |
| Secondary structure analysis of amplicon                              | D          | ND                  | Statistical methods for results significance                             | E          | Materials & Methods |
| Location of each primer by exon or intron (if applicable)             | E          | NA                  | Software (source, version)                                               | E          | Materials & Methods |

What splice variants are targeted?

E NA

Cq or raw data submission with RDML

D ND

NA= Not Applicable, ND= Not Determine
